# Supplementary material
Source: PubMed Central journal article supplement (PMC8815592)
Supplement: KID.0000372019SupplementaryData.pdf [file KID.0000372019SupplementaryData.pdf]

**Title Page**

**Original Article**

**Heterozygous urinary abnormality-causing variants of *COL4A3* and *COL4A4* affect severity of autosomal recessive Alport syndrome**

**Tomoko Horinouchi M.D., Ph.D.<sup>1</sup>, Tomohiko Yamamura M.D., Ph.D.<sup>1</sup>, China Nagano**

**M.D.<sup>1</sup>, Nana Sakakibara M.D.<sup>1</sup>, Shinya Ishiko M.D.<sup>1</sup>, Yuya Aoto M.D.<sup>1</sup>, Rini Rossanti**

**M.D.<sup>1</sup>, Koichi Nakanishi M.D., Ph.D.<sup>2</sup>, Yuko Shima M.D., Ph.D.<sup>3</sup>, Naoya Morisada M.D.,**

**Ph.D.<sup>1</sup>, Kazumoto Iijima M.D., Ph.D.<sup>1</sup>, Kandai Nozu M.D., Ph.D.<sup>1</sup>**

Table S1. Patient clinical and genetic information

| Patient ID | Gender | Age | ESRD age ( Cr-eGFR ) | Hearing loss | Ocular lesion        | Gene   | Mutation1         |                        |                                                        | Mutation2         |                     |                                         |
|------------|--------|-----|----------------------|--------------|----------------------|--------|-------------------|------------------------|--------------------------------------------------------|-------------------|---------------------|-----------------------------------------|
|            |        |     |                      |              |                      |        | Nucleotide change | Amino acid change      | Urinary/Pathological findings or diagnosis in carriers | Nucleotide change | Amino acid change   | Urinary/Historical findings in carriers |
| 94         | female | 17  | (64.1)               | -            | -                    | COL4A3 | c.4793T>G         | p.Leu1598Arg           | ID 143's M: OB                                         | c.145-2A>G        | Exon3(90bp)skipping | -                                       |
| 108        | male   | 16  | (107.0)              | -            | -                    | COL4A3 | c.4028-27 A>G     | Exon46(126bp) skipping | ID 108's F: OB                                         | c.2698_2714del    | p.Ile900Profs*34    | -                                       |
| 114        | male   | 20  | (34.0)               | +            | -                    | COL4A3 | c.3266G>A         | p.Gly1089Asp           | -                                                      | c.3266G>A         | p.Gly1089Asp        | -                                       |
| 115        | female | 19  | (57.8)               | +            | -                    | COL4A3 | c.1844dup         | p.Pro616Thrfs*30       | -                                                      | c.3687del         | p.Gly1231Valfs*33   | -                                       |
| 125        | female | 22  | (138.1)              | -            | Retinal regeneration | COL4A3 | c.2330G>A         | p.Gly777Asp            | ID 130's M: Pro/OB                                     | c.4354A>T         | p.Ser1452Cys        | -                                       |
| 125-1      | male   | 21  | (8.9)                | -            | -                    | COL4A3 | c.2330G>A         | p.Gly777Asp            | ID 130's M : Pro/OB                                    | c.4354A>T         | p.Ser1452Cys        | -                                       |
| 125-2      | male   | 11  | (126.2)              | -            | -                    | COL4A3 | c.2330G>A         | p.Gly777Asp            | ID 130's M : Pro/OB                                    | c.4354A>T         | p.Ser1452Cys        | -                                       |
| 130        | female | 16  | 15                   | -            | Perimacular fleck    | COL4A3 | c.2330G>A         | p.Gly777Asp            | ID 130's M : Pro/OB                                    | c.4793T>G         | p.Leu1598Arg        | ID 143's M:OB                           |
| 130-1      | female | 18  | 11                   |              |                      | COL4A3 | c.2330G>A         | p.Gly777Asp            | ID 130's M : Pro/OB                                    | c.4793T>G         | p.Leu1598Arg        | ID 143's M :OB                          |
| 137        | male   | 20  | 13                   | +            |                      | COL4A3 | c.4928G>A         | p.Arg1643Lys           | -                                                      | c.40_63del        | p.Leu14_Leu21del    | Longo et al. (ADAS)                     |
| 137-1      | female | 27  | 26                   | -            |                      | COL4A3 | c.4928G>A         | p.Arg1643Lys           | -                                                      | c.40_63del        | p.Leu14_Leu21del    | Longo et al. (ADAS)                     |

|       |        |    |          |   |                      |        |                   |                      |                                       |                            |                            |                                           |
|-------|--------|----|----------|---|----------------------|--------|-------------------|----------------------|---------------------------------------|----------------------------|----------------------------|-------------------------------------------|
| 143   | female | 2  | (122.1)  |   |                      | COL4A3 | c.4793T>G         | p.Leu1598Arg         | ID 143's M : OB                       | c.2125G>T                  | p.Gly709Term               | -                                         |
| 155   | male   | 36 | 19       | + | -                    | COL4A3 | c.4463-523<br>C>G | Cryptic exon(139bp)  | -                                     | c.4463-523<br>C>G          | Cryptic exon(139bp)        | -                                         |
| 155-1 | female | 33 | 21       | + | Band-<br>keratopathy | COL4A3 | c.4463-523<br>C>G | Cryptic exon(139bp)  | -                                     | c.4463-523<br>C>G          | Cryptic exon(139bp)        | -                                         |
| 165   | male   | 6  | (167.8)  | - | -                    | COL4A3 | c.689G>A          | p.Gly230Asp          | ID 165's M or F:<br>OB                | c.1576-20_1576-<br>6del    | Exon25(183bp)skipping      | ID 165's M or<br>F: OB                    |
| 166   | female | 18 | 18       | - | -                    | COL4A3 | c.1855G>A         | p.Gly619Arg          | ID 166's M: OB ID<br>473's M: OB      | c.1060G>T                  | p.Gly354Term               | -                                         |
| 167   | female | 21 | (158.7)  | + | -                    | COL4A3 | c.4708T>C         | p.Cys1570Arg         | -                                     | c.40_63del                 | p.Leu14_Leu21del           | Longo et al.<br>(ADAS)                    |
| 168   | male   | 19 | 19       | - | -                    | COL4A3 | c.1918G>A         | p.Gly640Arg          | ID 168's M: OB, ID<br>168's F: OB•TBM | c.1918G>A                  | p.Gly640Arg                | ID 168's M: OB,<br>ID 168's F: OB•<br>TBM |
| 169   | male   | 19 | (107.84) | + | -                    | COL4A3 | c.4793T>G         | p.Leu1598Arg         | ID 143's M : OB                       | c.3752-<br>511_3955+576del | Exon43-44del<br>(131+73bp) | -                                         |
| 170   | female | 7  | (119.52) | - | -                    | COL4A3 | c.1354G>A         | p.Gly452Arg          | ID 170's F: OB                        | c.3821dup                  | p.His1275Profs*34          | -                                         |
| 171   | male   | 16 | 9        | + | -                    | COL4A3 | c.40_63del        | p.Leu14_Leu21del     | Longo et al.<br>(ADAS)                | c.40_63del                 | p.Leu14_Leu21del           | Longo et al.<br>(ADAS)                    |
| 171-1 | female | 11 | 11       | + | -                    | COL4A3 | c.40_63del        | p.Leu14_Leu21del     | Longo et al.<br>(ADAS)                | c.40_63del                 | p.Leu14_Leu21del           | Longo et al.<br>(ADAS)                    |
| 173   | male   | 25 | 25       | + | -                    | COL4A3 | c.3464G>A         | p.Gly1155Asp         | -                                     | c.4793T>G                  | p.Leu1598Arg               | ID 143's M: OB                            |
| 179   | female | 45 | 45       | + | -                    | COL4A3 | c.2863G>A         | p.Gly955Arg          | -                                     | c.4793T>G                  | p.Leu1598Arg               | ID 143's M: OB                            |
| 245   | male   | 41 | (91.54)  | + | -                    | COL4A3 | c.933+1G>A        | Exon16(45bp)skipping | -                                     | c.3650_3657del             | p.Pro1217Hisfs*89          | -                                         |

|       |        |    |          |   |           |        |           |              |                                  |                                    |                   |                         |
|-------|--------|----|----------|---|-----------|--------|-----------|--------------|----------------------------------|------------------------------------|-------------------|-------------------------|
| 412   | male   | 19 | (80.70)  | - | -         | COL4A3 | c.1576G>T | p.Gly526Cys  | ID 412's M: OB                   | c.3883-1G>C                        | N/A               | -                       |
| 415   | female | 17 | (107.70) | + | -         | COL4A3 | c.4708T>C | p.Gly1507Arg | -                                | c.4441C>T                          | p.Arg1481Term     | -                       |
| 473   | female | 8  | (73.93)  | - | -         | COL4A3 | c.1855G>A | p.Gly619Arg  | ID 166's M: OB<br>ID 473's M: OB | c.4793T>G                          | p.Leu1598Arg      | ID 143's M: OB          |
| 525   | female | 11 | (129.84) | + | -         | COL4A3 | c.1994G>A | p.Gly665Asp  | ID 525's M: OB                   | c.1216C>T                          | p.Arg406Term      | -                       |
| 570   | male   | 45 | (53.79)  | - | -         | COL4A3 | c.3427G>A | p.Gly1143Arg | ID 570's M: OB<br>(Any)          | c.4085del                          | p.Pro1362Hisfs*23 | ID 570's M: OB<br>(Any) |
| 570-1 | male   | 47 | 31       |   |           | COL4A3 | c.3427G>A | p.Gly1143Arg | ID 570's M: OB<br>(Any)          | c.4085del                          | p.Pro1362Hisfs*23 | ID 570's M: OB<br>(Any) |
| 595   | female | 19 | 18       | - | -         | COL4A3 | c.953G>A  | p.Gly318Asp  | ID 595's F: OB/Pro<br>CKD        | c.4793T>G                          | p.Leu1598Arg      | ID 143's M: OB          |
| 85    | female | 23 | (98.35)  | - | -         | COL4A4 | c.2510G>C | p.Gly837Ala  | Kamiyoshi et al.<br>(ADAS)       | c.3151G>C                          | p.Gly1051Arg      | ID 85's F: OB           |
| 145   | female | 26 | (106.13) | - | -         | COL4A4 | c.3307G>A | p.Gly1103Arg | -                                | c.3307G>A                          | p.Gly1103Arg      | -                       |
| 156   | female | 7  | (136.64) | - | -         | COL4A4 | c.2608G>C | p.Gly870Arg  | -                                | c.3687dup                          | p.Gly1230Argfs*23 | -                       |
| 172   | male   | 16 | 14       | + | -         | COL4A4 | c.2084G>A | p.Gly695Asp  | ID 172's M: OB                   | c.3612_3621del                     | p.Ile1205*        | ID 172's F: OB•<br>TBM  |
| 174   | male   | 2  | (100.81) | - | -         | COL4A4 | c.1733G>T | p.Gly578Val  | -                                | c.4241_4254del                     | p.Asp1414Glyfs*14 | ID 174's M: OB          |
| 204   | male   | 11 | (102.74) | - | -         | COL4A4 | c.2084G>A | p.Gly695Asp  | ID 172's M: OB                   | c.4469G>C                          | p.Gly1490Ala      | -                       |
| 218   | male   | 12 | (65.77)  | - | hyperopia | COL4A4 | c.2878G>A | p.Gly960Arg  | ID 218's F: OB                   | c.559-491_1460-<br>808del insPolyT | Exon8-Exon25 del  | ID 218's M: OB          |
| 257   | female | 18 | (107.44) | - | -         | COL4A4 | c.3160G>C | p.Gly1054Arg | ID 257's F: OB                   | c.3307G>A                          | p.Gly1103Arg      | -                       |
| 270   | female | 47 | (45.49)  | - | -         | COL4A4 | c.203G>A  | p.Gly68Glu   | -                                | c.2437G>C                          | p.Gly813Arg       | ID 270's F: OB          |
| 309   | female | 2  | (126.66) | - | -         | COL4A4 | c.2566C>T | p.Gln856Term | ID 309's F: OB/Pro               | c.3687del                          | p.Gly1230Valfs*58 | ID 309's M: OB          |

|       |        |    |          |   |   |        |           |               |                                  |            |                  |                                  |
|-------|--------|----|----------|---|---|--------|-----------|---------------|----------------------------------|------------|------------------|----------------------------------|
| 468   | female | 4  | (153.85) | - | - | COL4A4 | c.1580G>T | p.Gly527Val   | -                                | c.3160G>T  | p.Gly1054Cys     | ID 468's F:OB                    |
| 471   | female | 41 | (29.53)  | + | - | COL4A4 | c.4953G>A | p.Trp1651Term | -                                | c.2930del  | p.Pro977Leufs*61 | -                                |
| 476   | female | 21 | (124.99) | - | - | COL4A4 | c.2510G>C | p.Gly837Ala   | Kamiyoshi et al.<br>(ADAS)       | c.4817G>A  | p.Gly1606Glu     | Baek et al.                      |
| 601   | female | 22 | (82.08)  | - | - | COL4A4 | c.3262G>C | p.Gly1088Arg  | ID 601's F: OB                   | c.3307G>A  | p.Gly1103Arg     | -                                |
| 738   | male   | 37 | N/A      | + | - | COL4A4 | c.2617G>A | p.Gly873Arg   | ID 738's M: OB ·<br>60yr ESRD    | c.594+5G>A | N/A              | -                                |
| 738-1 | female | 33 | 27       | + | - | COL4A4 | c.2617G>A | p.Gly873Arg   | ID 738's M: OB ·<br>60yr ESRD    | c.594+5G>A | N/A              | -                                |
| 741   | female | 7  | (132.27) | - | - | COL4A4 | c.1795G>C | p.Gly599Arg   | ID 741's M: OB<br>ID 741's F: OB | c.1795G>C  | p.Gly599Arg      | ID 741's M: OB<br>ID 741's F: OB |

ESRD: End-stage renal disease

CKD: Chronic kidney disease

OB: Occult blood

Pro: Proteinuria

TBM: Thin basement membrane

ADAS: Autosomal dominant Alport syndrome

M: Mother

F: Father

Kamiyoshi et al.: This mutation was reported by Kamiyoshi et al. (1)

Longo et al.: This mutation was reported by Longo et al. (2)

Baek et al.: This mutation was reported by Baek et al. (3)

1. Kamiyoshi N, Nozu K, Fu XJ, Morisada N, Nozu Y, Ye MJ, Imafuku A, Miura K, Yamamura T, Minamikawa S, Shono A, Ninchoji T, Morioka I, Nakanishi K, Yoshikawa N, Kaito H, Iijima K: Genetic, Clinical, and Pathologic Backgrounds of Patients with Autosomal Dominant Alport Syndrome. *Clinical journal of the American Society of Nephrology : CJASN*, 11: 1441-1449, 2016
2. Longo I, Porcedda P, Mari F, Giachino D, Meloni I, Deplano C, Brusco A, Bosio M, Massella L, Lavoratti G, Roccatello D, Frasca G, Mazzucco G, Muda AO, Conti M, Fasciolo F, Arrondel C, Heidet L, Renieri A, De Marchi M: COL4A3/COL4A4 mutations: from familial hematuria to autosomal-dominant or recessive Alport syndrome. *Kidney international*, 61: 1947-1956, 2002
3. Baek JI, Choi SJ, Park SH, Choi JY, Kim CD, Kim YL, Kim UK: Identification of novel variants in the COL4A4 gene in Korean patients with thin basement membrane nephropathy. *The Indian journal of medical research*, 129: 525-533, 2009
